# Supplementary material
Source: PubMed Central journal article supplement (PMC10694030)
Supplement: JI_2300607_Supplemental_1.pdf [file JI_2300607_Supplemental_1.pdf]

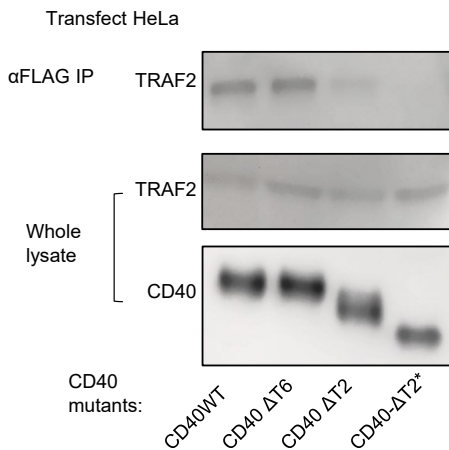

Supplementary Fig1. Association of TRAF2 with CD40 mutants from transfected HeLa cells. HeLa cells were transfected with the indicated form of FLAG-tagged CD40 together with V5-tagged TRAF2. CD40 was immunoprecipitated from cell lysates using anti-FLAG® M2 affinity gel and bound proteins were eluted and blotted for TRAF2 using anti-V5 mAb. The lower two panels show expression of V5-TRAF2 and FLAG-CD40 in whole cell lysates.

### MOG<sub>33-55</sub>

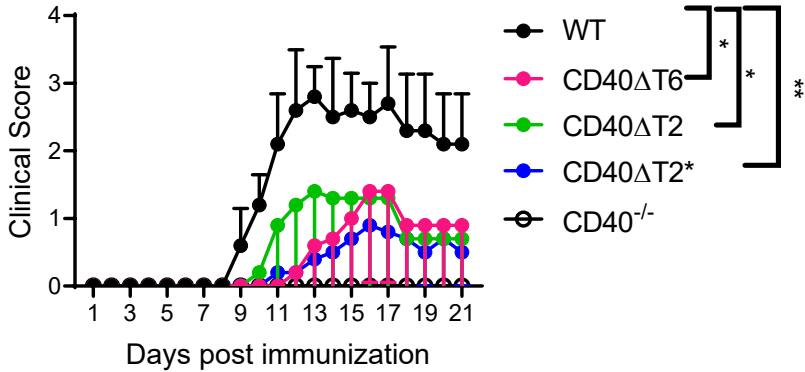

Supplementary Fig2. WT or CD40 mutant mice were immunized with 200  $\mu$ g MOG<sub>35-55</sub> in complete Freund's adjuvant containing Mycobacterium tuberculosis H37Ra. Pertussis toxin (120 ng) diluted in PBS was administered by intraperitoneal injection on days 0 and 2 post-immunization. The clinical severity of EAE was scored using a grading scale of 0-5 (mean  $\pm$  S.E.M. using 5 mice per group). Median of the clinical score during day 11-27 for WT mice was compared to each CD40 mutant using a two-tailed non-parametric Mann-Whitney test. \*  $p < 0.05$ , \*\*  $p < 0.01$ .

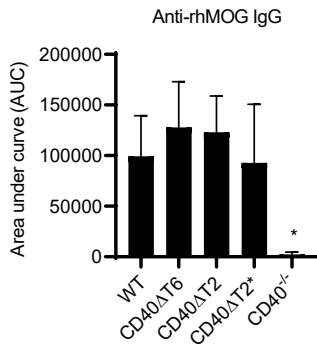

Supplementary Fig3. WT and CD40 mutant mice were immunized with rhMOG to induce EAE. Serum was collected three weeks after immunization, and anti-rhMOG IgG was determined by ELISA. Data are combined from two independent experiments (mean  $\pm$  S.D. using 4-6 mice per group). One-way ANOVA followed by Dunnett's test against the immunized WT group was performed for multiple comparisons. \*  $p < 0.05$
